# Supplementary material for: Biomimetic and molecular level-based silicate bioactive glass–gelatin hybrid implants for loading-bearing bone fixation and repair
Source: Royal Society of Chemistry journal article supplement (doi:10.1039/c3tb20941e), 2013-01-01
Supplement: c3tb20941e.pdf [file c3tb20941e.pdf]

## Biomimetic and molecular level-based silicate bioactive glass-gelatin hybrid implants for loading-bearing bone fixation and repair

Bo Lei <sup>a\*</sup>, Ling Wang <sup>a</sup>, Xiaofeng Chen <sup>b</sup>, Su-Kyoung Chae <sup>c</sup>

<sup>a</sup> Center for Biological Engineering and Regenerative Medicine (CBERM), Frontier Institute of Science and Technology, Xi'an Jiaotong University, Xi'an, China

<sup>b</sup> School of Materials Science and Engineering, South China University of Technology, Guangzhou, China

<sup>c</sup> Harvard-MIT Division of Health Sciences and Technology, Massachusetts Institute of Technology, Cambridge, MA, USA

### Supporting Information

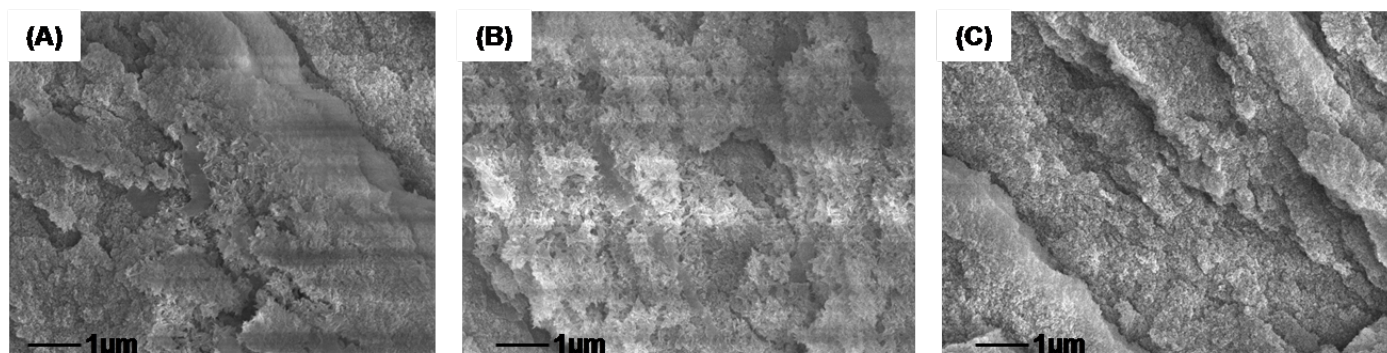

**Figures 1.** SEM images of S4GT6 (A), S5GT5 (B), S6GT4 (C) hybrid implants after soaking in SBF for 7 days.
